# Supplementary material for: The Mediterranean Diet in the Stroke Belt: A Cross-Sectional Study on Adherence and Perceived Knowledge, Barriers, and Benefits
Source: MDPI journal article supplement (doi:10.3390/nu11081847), 2019-08-09
Supplement: s1 [file s1]

Table S1: Mediterranean Diet Adherence Screener

**We would like to ask you a few questions about your diet:**

|                                                                                                                                                                                                            | <b>Check the box that applies</b> |                                 |                                |
|------------------------------------------------------------------------------------------------------------------------------------------------------------------------------------------------------------|-----------------------------------|---------------------------------|--------------------------------|
|                                                                                                                                                                                                            | Yes                               | No                              |                                |
| 1. Do you use olive oil as main culinary fat?                                                                                                                                                              | <input type="checkbox"/>          | <input type="checkbox"/>        |                                |
| 2. How many tablespoons of olive oil do you consume in a given day (including oil used for frying, salads, out-of-house meals, etc.)?                                                                      | <1<br><input type="checkbox"/>    | 1-4<br><input type="checkbox"/> | >4<br><input type="checkbox"/> |
| 3. How many vegetable servings do you consume per day? (1 serving: ½ cup cooked, 1 cup raw [consider side dishes as half a serving])                                                                       | <1<br><input type="checkbox"/>    | 1-2<br><input type="checkbox"/> | >2<br><input type="checkbox"/> |
| 4. How many fruit units (including natural fruit juices) do you consume per day? (1 serving: 1 cup)                                                                                                        | <1<br><input type="checkbox"/>    | 1-3<br><input type="checkbox"/> | >3<br><input type="checkbox"/> |
| 5. How many servings of red meat, hamburger, or meat products (ham, sausage, etc.) do you consume per day? (1 serving: 2-3 ounces)                                                                         | <1<br><input type="checkbox"/>    | 1-3<br><input type="checkbox"/> | >3<br><input type="checkbox"/> |
| 6. How many servings of butter, margarine, or cream do you consume per day? (1 serving: 1 tablespoon)                                                                                                      | <1<br><input type="checkbox"/>    | 1-3<br><input type="checkbox"/> | >3<br><input type="checkbox"/> |
| 7. How many sweet or carbonated beverages do you drink per day?                                                                                                                                            | <1<br><input type="checkbox"/>    | 1-3<br><input type="checkbox"/> | >3<br><input type="checkbox"/> |
| 8. How many glasses of wine do you drink per week?<br><input type="checkbox"/> Red <input type="checkbox"/> White <input type="checkbox"/> Both                                                            | <2<br><input type="checkbox"/>    | 2-7<br><input type="checkbox"/> | >7<br><input type="checkbox"/> |
| 9. How many servings of legumes (beans, black eyed peas) do you consume per week? (1 serving: 1 cup)                                                                                                       | <1<br><input type="checkbox"/>    | 1-3<br><input type="checkbox"/> | >3<br><input type="checkbox"/> |
| 10. How many servings of fish or shellfish do you consume per week? (1 serving: 2-3 ounces of fish or 3 ounces of shellfish)                                                                               | <1<br><input type="checkbox"/>    | 1-3<br><input type="checkbox"/> | >3<br><input type="checkbox"/> |
| 11. How many times per week do you consume commercial sweets or pastries (not homemade), such as cakes, cookies, biscuits, or custard?                                                                     | <3<br><input type="checkbox"/>    | 3-5<br><input type="checkbox"/> | >5<br><input type="checkbox"/> |
| 12. How many servings of nuts (including peanuts) do you consume per week? (1 serving: ¼ cup)                                                                                                              | <1<br><input type="checkbox"/>    | 1-3<br><input type="checkbox"/> | >3<br><input type="checkbox"/> |
| 13. Do you preferentially consume chicken, turkey, or rabbit meat instead of veal, pork, hamburger, or sausage?<br>Are you a vegetarian or vegan? <input type="checkbox"/> Yes <input type="checkbox"/> No | Yes<br><input type="checkbox"/>   | No<br><input type="checkbox"/>  |                                |
| 14. How many times per week do you consume boiled vegetables, pasta, rice, or other dishes with a sauce of tomato, garlic, onion, or leeks without meat sautéed in olive oil?                              | <1<br><input type="checkbox"/>    | 1-2<br><input type="checkbox"/> | >2<br><input type="checkbox"/> |

Table S2: Stage of changes questions and benefits and barriers section

**The next set of questions and responses are based on your knowledge, attitudes, and beliefs about a Mediterranean-based diet.**

In this survey a Mediterranean-based diet is characterized by a high intake of fruit, vegetables, olive oil, nuts, and cereals; a moderate intake of fish and poultry; a low intake of dairy products, red meat, processed meats, and sweets; and wine in moderation, consumed with meals.

**Check the box that applies.**

|    |                                                                             |
|----|-----------------------------------------------------------------------------|
| 1. | Have you ever heard of about a Mediterranean-based diet?                    |
|    | Yes [if you checked Yes, go to Question 2]                                  |
|    | No                                                                          |
| 2. | Are you currently eating a Mediterranean-based diet?                        |
|    | Yes                                                                         |
|    | No [if you checked No, go to Question 3]                                    |
| 3. | Which best describes your thoughts about eating a Mediterranean-based diet? |
|    | I've never thought about it.                                                |
|    | I'm undecided about it.                                                     |
|    | I've decided I don't want to eat it.                                        |
|    | I've decided I do want to eat it.                                           |

**For next set of questions check the box to indicate whether you agree or disagree with the statements below.**

|                                                                               | Strongly<br>Disagree | Disagree | Neither<br>Agree or<br>Disagree | Agree | Strongly<br>Agree |
|-------------------------------------------------------------------------------|----------------------|----------|---------------------------------|-------|-------------------|
| 4. I need more information about a Mediterranean-based diet.                  |                      |          |                                 |       |                   |
| 5. I do not think about the nutritional aspects of the types of foods I eat.  |                      |          |                                 |       |                   |
| 6. I find there are a lot of conflicting messages concerning healthy eating.  |                      |          |                                 |       |                   |
| 7. It would be too expensive to eat Mediterranean-based diet foods.           |                      |          |                                 |       |                   |
| 8. My family/partner won't eat a Mediterranean-based diet.                    |                      |          |                                 |       |                   |
| 9. Mediterranean-based diet meals or snacks are not available when I eat out. |                      |          |                                 |       |                   |
| 10. Someone else decides on most of the foods I eat.                          |                      |          |                                 |       |                   |
| 11. It takes too long to prepare Mediterranean-based diet meals.              |                      |          |                                 |       |                   |
| 12. I don't want to change my eating habit or routine.                        |                      |          |                                 |       |                   |
| 13. I don't have enough willpower to eat a Mediterranean-based diet.          |                      |          |                                 |       |                   |
| 14. I don't know how to prepare Mediterranean-based diet meals.               |                      |          |                                 |       |                   |
| 15. A Mediterranean-based diet would not be tasty enough.                     |                      |          |                                 |       |                   |
| 16. There is not enough protein in a Mediterranean-based diet.                |                      |          |                                 |       |                   |
| 17. If I eat a Mediterranean-based diet, it would not be filling enough.      |                      |          |                                 |       |                   |

|     |                                                                                |  |  |  |
|-----|--------------------------------------------------------------------------------|--|--|--|
| 18. | If I eat a Mediterranean-based diet, I would miss eating lots of junk.         |  |  |  |
| 19. | There is not enough iron in a Mediterranean-based diet.                        |  |  |  |
| 20. | If I eat a Mediterranean-based diet, I would be worried about my health.       |  |  |  |
| 21. | If I eat a Mediterranean-based diet, I wouldn't get enough energy or strength. |  |  |  |

**For next set of responses, check the box to indicate whether you agree or disagree with the completion of the following sentence:**

**By eating a Mediterranean-based diet, I will ...**

|     |                                                                                                     | Strongly<br>Disagree | Disagree | Neither<br>Agree or<br>Disagree | Agree | Strongly<br>Agree |
|-----|-----------------------------------------------------------------------------------------------------|----------------------|----------|---------------------------------|-------|-------------------|
| 22. | Decrease my saturated fat intake                                                                    |                      |          |                                 |       |                   |
| 23. | Improve my digestion                                                                                |                      |          |                                 |       |                   |
| 24. | Be fit                                                                                              |                      |          |                                 |       |                   |
| 25. | Have a better quality of life                                                                       |                      |          |                                 |       |                   |
| 26. | Live longer                                                                                         |                      |          |                                 |       |                   |
| 27. | Be healthier by decreasing my intake of chemicals, steroids, and antibiotics that are found in meat |                      |          |                                 |       |                   |
| 28. | Eat more fruits and vegetables                                                                      |                      |          |                                 |       |                   |
| 29. | Reduce my chances of developing major diseases                                                      |                      |          |                                 |       |                   |
| 30. | Eat high protein foods                                                                              |                      |          |                                 |       |                   |
| 31. | Eat foods high in fiber and roughage                                                                |                      |          |                                 |       |                   |
| 32. | Eat foods to help me control my weight                                                              |                      |          |                                 |       |                   |
| 33. | Use olive oil which is more healthy for me and/or my family                                         |                      |          |                                 |       |                   |
| 34. | Help the environment                                                                                |                      |          |                                 |       |                   |
| 35. | Help animal welfare / rights                                                                        |                      |          |                                 |       |                   |
| 36. | Eat foods that contains natural ingredients                                                         |                      |          |                                 |       |                   |
| 37. | Eat foods that are easy to plan, buy, and prepare                                                   |                      |          |                                 |       |                   |
| 38. | Eat foods that are familiar                                                                         |                      |          |                                 |       |                   |
| 39. | Eat foods that are like the foods I ate when I was a child                                          |                      |          |                                 |       |                   |
| 40. | Save money                                                                                          |                      |          |                                 |       |                   |
| 41. | Eat foods that are good value for money                                                             |                      |          |                                 |       |                   |
| 42. | foods that tastes better than processed foods                                                       |                      |          |                                 |       |                   |
| 43. | Use olive oil to improve the taste of cooked meals                                                  |                      |          |                                 |       |                   |
| 44. | Eat a greater variety of foods                                                                      |                      |          |                                 |       |                   |
| 45. | Be more content with myself                                                                         |                      |          |                                 |       |                   |
| 46. | Eat foods to help me cope with stress                                                               |                      |          |                                 |       |                   |
| 47. | Eat foods to make me feel good                                                                      |                      |          |                                 |       |                   |

Table S3: Barrier Questions with Factors

| <b>Barrier</b>                                                                  | <i>Source</i>                            |
|---------------------------------------------------------------------------------|------------------------------------------|
| <i>Knowledge</i>                                                                |                                          |
| I need more information about a Mediterranean-based diet.                       | Lea, Crawford, Worlsey, 2006 (23)        |
| I do not think about the nutritional aspects of the types of foods I eat.       | Pettinger, Holdsworth, Gerber, 2004 (24) |
| I find there are a lot of conflicting messages concerning healthy eating.       | Pettinger, Holdsworth, Gerber, 2004      |
| I don't know how to prepare Mediterranean-based diet meals.                     | Lea, Crawford, Worlsey, 2006             |
| <i>Convenience</i>                                                              |                                          |
| My family/partner won't eat a Mediterranean-based diet.                         | Lea, Crawford, Worlsey, 2006             |
| Mediterranean-based diet meals or snacks are not available when I eat out.      | Lea, Crawford, Worlsey, 2006             |
| Someone else decides on most of the foods I eat.                                | Lea, Crawford, Worlsey, 2006             |
| It takes too long to prepare Mediterranean-based diet meals.                    | Lea, Crawford, Worlsey, 2006             |
| <i>Sensory Appeal</i>                                                           |                                          |
| A Mediterranean-based diet would not be tasty enough.                           | Lea, Crawford, Worlsey, 2006             |
| If I eat a Mediterranean-based diet, it would not be filling enough.            | Lea, Crawford, Worlsey, 2006             |
| If I eat a Mediterranean-based diet, I would miss eating lots of junk.          | Lea, Crawford, Worlsey, 2006             |
| <i>Health</i>                                                                   |                                          |
| There is not enough protein in a Mediterranean-based diet.                      | Lea, Crawford, Worlsey, 2006             |
| There is not enough iron in a Mediterranean-based diet.                         | Lea, Crawford, Worlsey, 2006             |
| If I eat a Mediterranean-based diet, I would be worried about my health.        | Lea, Crawford, Worlsey, 2006             |
| If I eat a Mediterranean-based diet, I wouldn't get enough energy or strength.* | Lea, Crawford, Worlsey, 2006             |

\* - Question removed from analysis due to poor internal validity of the Health factor

Table S4: Benefit Questions with Factors

| <b>Barrier</b>                                                                                      | <i>Source</i>                                                |
|-----------------------------------------------------------------------------------------------------|--------------------------------------------------------------|
| <i>Knowledge</i>                                                                                    |                                                              |
| Decrease my saturated fat intake                                                                    | Lea, Crawford, Worsley, 2006 (23)                            |
| Improve my digestion                                                                                | Lea, Crawford, Worsley, 2006                                 |
| Have a better quality of life                                                                       | Lea, Crawford, Worsley, 2006                                 |
| Live longer                                                                                         | Lea & Worsley, 2002 (25)                                     |
| Eat more fruits and vegetables                                                                      | Lea & Worsley, 2002                                          |
| Reduce my chances of developing major diseases                                                      | Harnack, Block, Subar, Lane, Brand, 1997 (15)                |
| Eat high protein foods                                                                              | Steptoe, Pollard, Wardle, 1995 (27)                          |
| Eat foods high in fiber and roughage                                                                | Steptoe, Pollard, Wardle, 1995                               |
| Use olive oil which is more healthy for me and/or my family                                         | Thompson, Haziris, Alekos, 1994 (26)                         |
| Eat a greater variety of foods                                                                      | Lea, Crawford, Worsley, 2006                                 |
| <i>Weight Loss</i>                                                                                  |                                                              |
| Be fit                                                                                              | Lea, Crawford, Worsley, 2006                                 |
| Eat foods to help me control my weight                                                              | Lea, Crawford, Worsley, 2006                                 |
| <i>Natural Content</i>                                                                              |                                                              |
| Be healthier by decreasing my intake of chemicals, steroids, and antibiotics that are found in meat | Lea & Worsley, 2002                                          |
| Eat foods that contains natural ingredients                                                         | Lea, Crawford, Worsley, 2006                                 |
| <i>Ethical Concerns</i>                                                                             |                                                              |
| Help the environment                                                                                | Lea, Crawford, Worsley, 2006                                 |
| Help animal welfare / rights                                                                        | Lea, Crawford, Worsley, 2006                                 |
| <i>Convenience</i>                                                                                  |                                                              |
| Eat foods that are easy to plan, buy, and prepare                                                   | Pieniak, Verbeke, Vanhonacker Guerrerno, Hersleth, 2009 (28) |
| <i>Familiarity</i>                                                                                  |                                                              |
| Eat foods that are familiar                                                                         | Steptoe, Pollard, Wardle, 1995                               |
| Eat foods that are like the foods I ate when I was a child                                          | Steptoe, Pollard, Wardle, 1995                               |
| <i>Price</i>                                                                                        |                                                              |
| Save money                                                                                          | Lea, Crawford, Worsley, 2006                                 |
| Eat foods that are good value for money                                                             | Steptoe, Pollard, Wardle, 1995                               |
| <i>Sensory Appeal</i>                                                                               |                                                              |
| Eat foods that tastes better than processed foods                                                   | Pettinger, Holdsworth, Gerber, 2004 (24)                     |
| Use olive oil to improve the taste of cooked meals                                                  | Thompson, Haziris, Alekos, 1994                              |
| <i>Mood</i>                                                                                         |                                                              |
| Be more content with myself                                                                         | Lea, Crawford, Worsley, 2006                                 |
| Eat foods to help me cope with stress                                                               | Steptoe, Pollard, Wardle, 1995                               |
| Eat foods to make me feel good                                                                      | Steptoe, Pollard, Wardle, 1995                               |

Table S5: Demographic and anthropomorphic questions

**Finally, we would like to ask you a few questions about yourself**

1. Are you male or female?
  - a) Male ☐
  - b) Female ☐
  
2. How old are you?
  - a) less than 18 ☐
  - b) 18-24 ☐
  - c) 25-34 ☐
  - d) 35-44 ☐
  - e) 45-54 ☐
  - f) 55-64 ☐
  - g) 65-74 ☐
  - h) more than 75 ☐
  
3. What is your ethnic origin?
  - a) White ☐
  - b) Black African ☐
  - c) Black other ☐
  - d) Indian ☐
  - e) Pakistani ☐
  - f) Chinese ☐
  - g) Asian- other ☐
  - Please specify:* .....
  - h) Any other ethnic group ☐
  - Please specify:* .....
  
4. What is the highest level of education you have completed?
  - a) Elementary school ☐
  - b) Middle school ☐
  - c) High school diploma ☐
  - d) GED ☐
  - e) Technical or trade certificate ☐
  - f) Associate degree ☐
  - g) Bachelor's degree ☐
  - h) Master's or professional degree ☐
  
5. Do you have any health or nutrition related qualifications?
  - a) Yes ☐
  - Please specify:* .....
  - b) No ☐
  
6. What is your body weight?
 

*Please specify:* .....
  
7. What is your height?
 

*Please specify:* .....
